# Supplementary material for: Assessment of Gold-Bearing Quartz Vein as a Potential High-Purity Quartz Resource: Evidence from Mineralogy, Geochemistry, and Technological Purification
Source: MDPI journal article supplement (doi:10.3390/min13020261), 2023-02-13
Supplement: s1 [file s1]

Archive with 1 entries (1 files):
- minerals-2145416-supplementary.pdf
