# Supplementary material for: Assessment of Gold-Bearing Quartz Vein as a Potential High-Purity Quartz Resource: Evidence from Mineralogy, Geochemistry, and Technological Purification
Source: MDPI journal article supplement (doi:10.3390/min13020261), 2023-02-13
Supplement: s1 [file s1 › minerals-2145416-supplementary.pdf]

## Supplementary Data

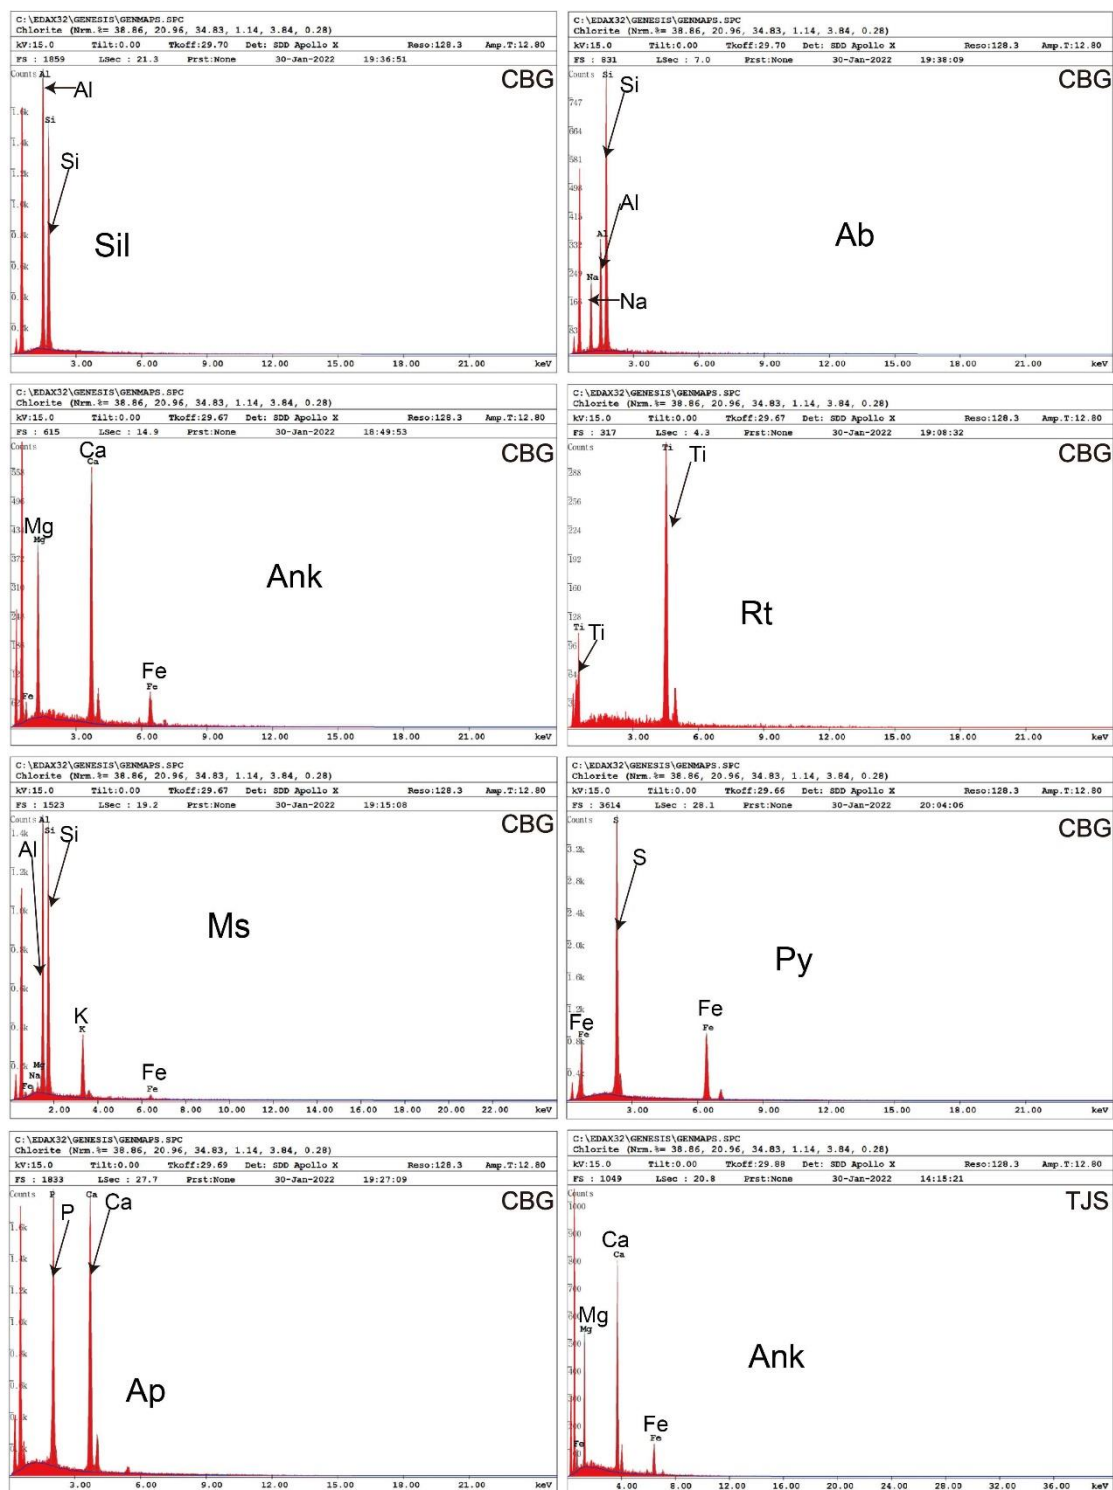

**Figure S1.** EDS analyses of co-existed minerals in the CBG and TJS raw vein quartz. Ank = ankerite, Ab = albite, Ap = apatite, Ms = muscovite, Py = pyrite, Sil = sillimanite, Rt = rutile.
